# Supplementary material
Source: PubMed Central journal article supplement (PMC5495460)
Supplement: NIHMS872273-supplement-Materials.pdf [file NIHMS872273-supplement-Materials.pdf]

Materials List for:

# An *In Vitro* Organ Culture Model of the Murine Intervertebral Disc

Jennifer W. Liu<sup>1,3</sup>, Kevin H. Lin<sup>2</sup>, Christian Weber<sup>1</sup>, Sameer Bhalla<sup>2</sup>, Sean Kelso<sup>4</sup>, Kaixi Wang<sup>3</sup>, Simon Y. Tang<sup>1,3,4</sup>

<sup>1</sup>Department of Biomedical Engineering, Washington University in St. Louis

<sup>2</sup>Department of Biology, Washington University in St. Louis

<sup>3</sup>Department of Orthopaedic Surgery, Washington University in St. Louis

<sup>4</sup>Department of Materials Science and Mechanical Engineering, Washington University in St. Louis

Correspondence to: Simon Y. Tang at [tangs@wudosis.wustl.edu](mailto:tangs@wudosis.wustl.edu)

URL: <https://www.jove.com/video/55437>

DOI: [doi:10.3791/55437](https://doi.org/10.3791/55437)

## Materials

| Name                              | Company                   | Catalog Number | Comments                                |
|-----------------------------------|---------------------------|----------------|-----------------------------------------|
| 96 well plate                     | Midwest Scientific        | TP92096        | Used for biochemical assays             |
| 24 well plate                     | Midwest Scientific        | TP92024        | Used for organ culture                  |
| 25 mL pipettes                    | Midwest Scientific        | TP94024        | Used for organ culture                  |
| 10 mL pipettes                    | Midwest Scientific        | TP94010        | Used for organ culture                  |
| 5 mL pipettes                     | Midwest Scientific        | TP94005        | Used for organ culture                  |
| 500 mL bottle top filters, 22 µm  | Midwest Scientific        | TP99505        | Used for filter media                   |
| 10 µL pipette tips                | Midwest Scientific        | NP89140098     | Used for biochemical assays             |
| 200 µL pipette tips               | Midwest Scientific        | NP89140900     | Used for biochemical assays             |
| 1,000 µL pipette tips             | Midwest Scientific        | NP89140920     | Used for biochemical assays             |
| DMEM/F-12                         | Invitrogen                | 11330032       | Used for culture media                  |
| Optiray 350                       | Guebert                   | 19133341       | Used for contrast enhanced microCT      |
| Fetal Bovine Serum                | Sigma                     | F2442          | Used for culture media                  |
| Penicillin Streptomycin           | Sigma                     | P4333          | Used for culture media                  |
| Tetrazolium Blue Chloride         | Sigma                     | T4375          | Used for biochemical assays             |
| D-Luciferin                       | Sigma                     | L6152          | Used for bioluminescence imaging        |
| Chondroitin Sulfate               | Sigma                     | C9819          | Used for biochemical assays             |
| 10% Phosphomolybdic Acid Solution | Sigma                     | HT152          | Used for contrast enhanced microCT      |
| Safranin O                        | Sigma                     | S8884          | diluted to .1% concentration (in water) |
| Fast Green FCF                    | Sigma                     | F7258          | .001% concentration                     |
| Papain from papaya latex          | Sigma                     | P3125          | Used for biochemical assays             |
| DAPI                              | Sigma-Aldrich             | D9542          | Nucleic acid staining                   |
| Cyanoacrylate Glue                | Loctite                   | 234790         | Adhesive                                |
| 1.5 mL Microcentrifuge Tubes      | Fischer Scientific        | S348903        | Used for biochemical assays             |
| <b>Big Equipment</b>              |                           |                |                                         |
| BioDent                           | ActiveLife                |                | For mechanical testing                  |
| Cytation 5                        | Biotek                    |                | Spectrophotometer                       |
| AxioCam503                        | Carl Zeiss AG             |                | Microscope                              |
| VivaCT40                          | Scanco                    |                | MicroCT                                 |
| Analytical balance                | Denver Instrument Company | A-200DS        | Analytical balance                      |
| Incubator HERAcell 150i           | Thermo Scientific         |                | Organ Culture                           |
| Dissection Scope                  | VistaVision               |                | Used during dissection                  |

|                                     |                                   |           |                                     |
|-------------------------------------|-----------------------------------|-----------|-------------------------------------|
| Laser Micrometer                    | Keyence                           | LK-081    | Measuring disc height               |
| Microcentrifuge 5810 R              | Eppendorf                         |           | Used for biochemical assays         |
| Microtome                           | Leica                             | RM2255    | Used for histology                  |
| <b>Software</b>                     |                                   |           |                                     |
| Prism 7                             | GraphPad                          |           | For statistics                      |
| MATLAB R2014a                       | Mathworks                         |           | For modeling                        |
| Osiri-LXIV                          | Pixmeo                            |           | Open Source                         |
| MeshLab v1.3.3                      | Visual Computing Lab - ISTI - CNR |           | Open Source                         |
| PreView/FEBio 2.3                   | Utah MRL & Columbia MBL           |           | Open Source                         |
| ImageJ                              | NIH                               |           |                                     |
| Microsoft Excel                     | Windows                           |           |                                     |
| <b>Dissection Tools</b>             |                                   |           |                                     |
| Cohan-Vannas Spring Scissors        | Fine Science Tools                | 15000-02  | Or any nice pair of spring scissors |
| Fine Scissors - Sharp (small)       | Fine Science Tools                | 14060-09  |                                     |
| Fine Scissors - Sharp (larger)      | Fine Science Tools                | 14060-11  |                                     |
| Dumont #5 Forceps                   | Fine Science Tools                | 11252-40  | At least 2; can also use #3         |
| Extra Fine Graefe Forceps, serrated | Fine Science Tools                | 11150-10  | At least 2                          |
| Micro-Adson Forceps, serrated       | World Precision Instruments       | 503719-12 |                                     |
| Micro-Adson Forceps, teeth          | World Precision Instruments       | 501244    |                                     |
| Scalpel Handle - #3                 | Fine Science Tools                | 10003-12  |                                     |
| Scalpel Handle - #4                 | Fine Science Tools                | 10004-13  |                                     |
| Scalpel Blades - #23                | Fine Science Tools                | 10023-00  |                                     |
| Insect Pins, size 000               | Fine Science Tools                | 26000-25  |                                     |
| 27 G Needle                         | BD PrecisionGlide Needles         | BD305109  |                                     |
